# Supplementary material
Source: publisher figshare collection journal article supplement (https://karger.figshare.com/ndownloader/files/17380190)
Supplement: Supplementary file 1 [file 17380190]

## Supplementary Table S1. Sensitivity analysis using ethnic groups

| Ethnic group | N (%) | Bivariate OR  (95% CI) |  | Multivariable OR^  (95% CI) |  |
| --- | --- | --- | --- | --- | --- |
| SSR |  |  |  |  |  |
| Chinese | 29519 (75.1%) | 1.00 |  | - |  |
| Indian | 2885 (7.3%) | 1.22 (0.97-1.53) |  |  |
| Malay | 5577 (14.2%) | 1.09 (0.91-1.30) |  |  |
| Others | 1342 (3.4%) | 1.07 (0.76-1.51) |  |  |
| CRRGSR |  |  |  |  |  |
| Caucasian | 4524 (55.8%) | 1.00 |  | 1.00 |  |
| African-American | 3461 (42.7%) | 0.74 (0.62-0.87) ** |  | 0.84 (0.71-0.99) ** |  |
| Asian | 60 (0.7%) | 0.52 (0.16-1.67) |  | 0.59 (0.14-1.60) |  |
| Hispanic | 30 (0.4%) | 0.34 (0.05-2.50) |  | 0.40 (0.02-1.92) |  |
| Others | 31 (0.4%) | 0.68 (0.16-2.86) |  | 0.72 (0.12-2.43) |  |

SSR: Singapore Stroke Registry; CRRGSR: Cognitive Rehabilitation Research Group Stroke Registry; OR: Odds ratio; CI: Confidence interval; ^Multivariable model was adjusted for admission year as well as history of stroke, ischemic heart disease and atrial fibrillation
